# Supplementary material
Source: PubMed Central journal article supplement (PMC6643650)
Supplement: ao7b00463_si_001.pdf [file ao7b00463_si_001.pdf]

## Supporting information

# ALD Al<sub>2</sub>O<sub>3</sub> coated TiO<sub>2</sub> nanotube layers as anodes for lithium ion batteries

*Hanna Sopha<sup>†</sup>, Girish D. Salian<sup>‡</sup>, Raul Zazpe<sup>†</sup>, Jan Prikryl<sup>†</sup>, Ludek Hromadko<sup>†</sup>, Thierry Djenizian<sup>§,\*</sup>, Jan M. Macak<sup>†,\*</sup>*

<sup>†</sup>Center of Materials and Nanotechnologies, Faculty of Chemical Technology, University of Pardubice, Nam. Cs. Legii 565, 53002 Pardubice, Czech Republic

<sup>‡</sup>Aix Marseille Université, CNRS, Electrochemistry of Materials Research Group, MADIREL UMR 7246, F-13397, Marseille Cedex 20, France

<sup>§</sup>Ecole Nationale Supérieure des Mines de Saint-Etienne, Flexible Electronics Department, Center Microelectronics Provence, 13541, Gardanne, France

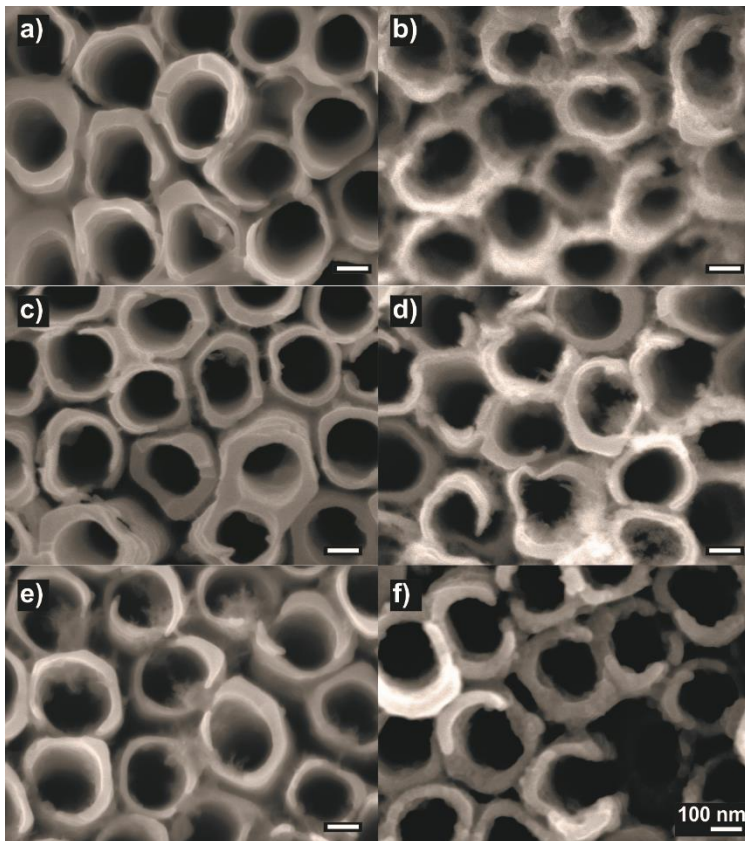

Figure S1. Post-cycling (100 charge/discharge cycles) SEM images of a) uncoated TiO<sub>2</sub> nanotube layer, b) 0.2 nm (2 ALD cycles), c) 1 nm (9 ALD cycles), d) 2 nm (18 ALD cycles), e) 5 nm (46 ALD cycles), and f) 10 nm (92 ALD cycles) Al<sub>2</sub>O<sub>3</sub> coated TiO<sub>2</sub> nanotube layers.

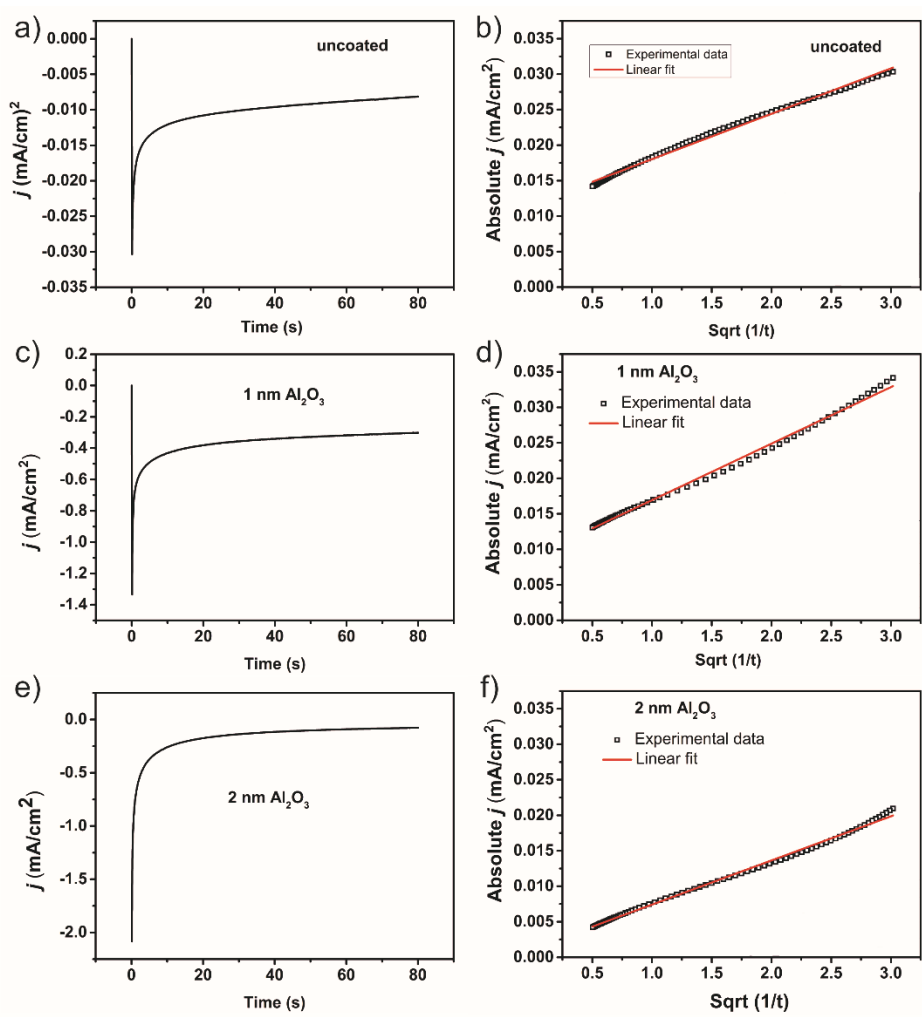

Figure S2. Chronoamperometric plots of the a) uncoated, c) 1 nm Al<sub>2</sub>O<sub>3</sub> coated, and e) 2 nm Al<sub>2</sub>O<sub>3</sub> coated TiO<sub>2</sub> nanotube layers, and the linear fits of the Cottrell plots for the b) uncoated, d) 1 nm Al<sub>2</sub>O<sub>3</sub> coated, and f) 2 nm Al<sub>2</sub>O<sub>3</sub> coated TiO<sub>2</sub> nanotube layers.

The reversible insertion reaction of  $\text{Li}^+$  in anatase  $\text{TiO}_2$  is given by eqn (1).

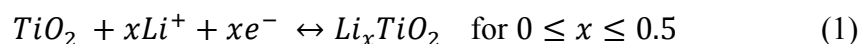

The chronoamperometric plot was obtained by applying a constant potential of 1.7 V vs.  $\text{Li}/\text{Li}^+$ , which is the potential of the insertion of  $\text{Li}^+$  into the lattice (Figure S2, a, c, e). The current observed for the electrochemical reaction at the mass transport limited condition is described by the Cottrell equation:<sup>2</sup>

$$j = nFCD^{1/2} \pi^{-1/2} t^{-1/2}$$

where  $n$  is the number of moles of  $\text{Li}^+$  involved in the redox reaction of  $\text{Ti}^{3+}/\text{Ti}^{4+}$  which is equal to 0.5 according to Equation (1),  $F$  is the Faraday constant,  $C$  is the maximum concentration of  $\text{Li}^+$  (or  $\text{Ti}^{3+}$ ) in the lattice ( $0.024 \text{ mol.cm}^{-3}$  at  $x = 0.5$ )<sup>1, 2</sup>,  $D$  is the Diffusion coefficient of  $\text{Li}^+$  and  $t$  is the time (s).

The Cottrell equation is valid only in the diffusion control region. The diffusion coefficient can be estimated by plotting the absolute current density ( $j$ ) vs.  $t^{-1/2}$ . Ideally, the plot is a straight line when the kinetic is controlled by mass transport. The value of the slope which is equal to  $nFCD^{1/2}\pi^{-1/2}$  can be determined by the linear fit of the Cottrell plots (Figure S2, b, d, f).

## References

- 1) Lindstrom, H.; Sodergren, S.; Solbrand, A.; Rensmo, H.; Hjelm, J.; Hagfeldt, A.; Lindquist, S. E.  $\text{Li}^+$  Ion Insertion in  $\text{TiO}_2$  (Anatase). 1. Chronamperometry on CVD Films and Nanoporous Films *J. Phys. Chem. B* 1997, 101, 7710–7716.
- 2) Kavan, L.; Rathouský, J.; Grätzel, M.; Shklover, V.; Zuka, A. Surfactant-Templated  $\text{TiO}_2$  (Anatase): Characteristic Features of Lithium Insertion Electrochemistry in Organized Nanostructures. *J. Phys. Chem. B* 2000, 104, 12012–12020.
